# Supplementary material for: Behavior Rating Inventory of Executive Function in Preschool (BRIEF-P) and Attention-Deficit and Hyperactivity Disorders (ADHD): A Systematic Review and Meta-Analysis of Floor and Ceiling Effects
Source: MDPI journal article supplement (doi:10.3390/children11010058), 2023-12-30
Supplement: s1 [file s1]

**Table S1.** Characteristics of the studies included in the review.

| Number | Author/<br>Year/<br>Country                      | Design                                                                             | Sample/n                                        | Age<br>(Mean,SE)                                                                                                        | IQ*<br>(Intelligence Quotient)<br>(Mean,SE)                                    | Diagnostic<br>instrument_ADHD                                                                                                              | Assessment<br>instrument<br>for EF                                                 | Executive profile                                                                         | Results                                                                                                                                                                                                                                                                                                                            |
|--------|--------------------------------------------------|------------------------------------------------------------------------------------|-------------------------------------------------|-------------------------------------------------------------------------------------------------------------------------|--------------------------------------------------------------------------------|--------------------------------------------------------------------------------------------------------------------------------------------|------------------------------------------------------------------------------------|-------------------------------------------------------------------------------------------|------------------------------------------------------------------------------------------------------------------------------------------------------------------------------------------------------------------------------------------------------------------------------------------------------------------------------------|
| 1      | (Lacerda, y otros, 2020)<br>Brazil               | Causal Comparison:<br>ADHD vs. Control                                             | ADHD=24<br>Control=55                           | ADHD= 5.58 (0.92)<br>(years)<br>N-ADHD= 5.46 (0.72)<br>(years)                                                          | ADHD=69.88(15.87)<br>N-ADHD= 76.64(17.20)                                      | The Schedule for<br>Affective Disorders<br>and Schizophrenia<br>for School Aged<br>Children-Present and<br>Lifetime Version<br>(K-SADS-PL) | >BRIEF-P<br>>Conners'<br>Kiddle<br>Continuous<br>Performance<br>Test (K-<br>CPT 2) | Inhibition                                                                                | Neuropsychological tasks<br>and parent reports of<br>executive functions (EF)<br>may not be sensitive<br>enough to differentiate<br>preterm and/or underweight<br>preschoolers with and<br>without ADHD.                                                                                                                           |
| 2      | (Ezpeleta & Granero, 2015)<br>[79] Sapin         | Causal<br>Comparison:Control<br>vs. ODD vs.<br>ADHD vs.<br>ODD+ADHD vs.<br>Control | Control=538<br>ODD=51<br>ADHD=23<br>ODD+ADHD=10 | Control=3.76(0.33)<br>(years)<br>ODD=3.87(0.30) (years)<br>ADHD=3.74(0.33)<br>(years)<br>ODD+ADHD=3.69(0.31)<br>(years) | Control=99.8(15.4)<br>ODD=98.0(16.4)<br>ADHD=91.9(21.0)<br>ODD+ADHD=88.5(16.6) | The Diagnostic<br>Interview for<br>Children and<br>Adolescents for<br>Parents of Preschool<br>and Young Children<br>(DICA-PPYC)            | >BRIEF-P<br>>The<br>Kiddie-<br>Continuous<br>Performance<br>Test (K-<br>CPT)       | Clinical Scales and Indices<br>(Global)                                                   | Executive functioning<br>deficits assessed with a<br>performance-based<br>with a performance-based<br>measure or behavioral<br>descriptions are specific to<br>children with ADHD,<br>compared to those with<br>ODD.                                                                                                               |
| 3      | (Zhang, y otros, 2018) [22]<br>China             | Causal Comparison:<br>ADHD vs. Control                                             | ADHD=163<br>Control=63                          | ADHD=59.1(7.2)<br>(months)<br>Control=59.7(5.3)<br>(months)                                                             | ADHD=7(3)<br>Control=8(4)<br>*Matrices                                         | Diagnostic Infant<br>and Preschool<br>Assessment (DIPA)                                                                                    | BRIEF-P                                                                            | Clinical Scales and Indices<br>(Global)                                                   | Combined assessment of<br>performance-based<br>neuropsychological testing<br>and BRIEF-P in<br>preschoolers with ADHD<br>shows deficits in many<br>areas.                                                                                                                                                                          |
| 4      | (Skogan, y otros, 2015) [78]<br>Norway           | Causal Comparison:<br>ADHD vs. ODD vs.<br>Ansiedad vs.<br>Control                  | ADHD=1134                                       | Total= 41.8(1.3)<br>(months)                                                                                            | Global= 101.8(9.2)                                                             | The Preschool Age<br>Psychiatric<br>Assessment<br>Interview (PAPA)                                                                         | BRIEF-P                                                                            | Inhibition<br>Working Memory                                                              | Early symptoms of ADHD<br>were related to parent-<br>reported difficulties<br>primarily in inhibition and<br>working memory.<br>Deficits in these two<br>domains of EF characterize<br>early forms of ADHD.<br>The clinical utility of the<br>BRIEF-P as a measure of<br>EF in preschoolers with<br>ADHD symptoms is<br>supported. |
| 5      | (Schneider, Ryan, &<br>Mahone, 2020)<br>[80] USA | Causal Comparison:<br>ADHD vs. Control                                             | ADHD=49<br>Control=35                           | ADHD= 5(0.6)<br>Control=<br>4.9(0.5) (years)                                                                            | ADHD=108.4(11.6)<br>Control=109.7(13.2)                                        | >Conners' Parent –<br>and Teacher - Rating<br>Scale Revises –<br>Long Form (CPRS-<br>R) (CTRS-R)                                           | BRIEF-P                                                                            | Inhibition<br>Flexibility<br>Emotional Control<br>Working Memory<br>Planning/Organization | There are differences<br>between evaluators on<br>BRIEF-P.<br>Parents rated more<br>symptoms than teachers.                                                                                                                                                                                                                        |
| 6      | (Perrin, Heller, & Loe,<br>2019)<br>[81] USA     | Causal Comparison:<br>ADHD vs. Control                                             | ADHD=45<br>Control=48                           | ADHD= 61(6.6)<br>(months)<br>Control=58(6.2)<br>(months)                                                                | ADHD= 98.6(16.4)<br>Control= 109.7(13.2)                                       | >Child Behavior<br>Checklist (CBCL)                                                                                                        | BRIEF-P                                                                            | Clinical Scales and Indices<br>(Global)                                                   | Early identification of<br>impairment in children with<br>ADHD symptoms is<br>recommended, along with<br>specific intervention.                                                                                                                                                                                                    |

|   |                                                            |                                    |                       |                                                       |                                            |                                                                                                                                                                                 |         |                                      |                                                                                                                                    |
|---|------------------------------------------------------------|------------------------------------|-----------------------|-------------------------------------------------------|--------------------------------------------|---------------------------------------------------------------------------------------------------------------------------------------------------------------------------------|---------|--------------------------------------|------------------------------------------------------------------------------------------------------------------------------------|
| 7 | (Çak, Çengel, Gökler, Öktem, & Taşkıran, 2017) [71] Turkey | Causal Comparison:ADHD vs. Control | Control=52<br>ADHD=21 | Control=56.9(9.1) (months)<br>ADHD=58.1(8.3) (months) | Control=109.54(33.79)<br>ADHD=98.13(19.45) | >The Kiddie-Schedule for Affective Disorders and Schizophrenia-Present and Lifetime version (K-SADS-PL)<br>>The Conners' Parent Rating Scales - Revised / Short Form (CPRS-R/S) | BRIEF-P | Clinical Scales and Indices (Global) | Combined methods are suggested for a comprehensive assessment of preschoolers with inattentive and hyperactive/impulsive behavior. |
|---|------------------------------------------------------------|------------------------------------|-----------------------|-------------------------------------------------------|--------------------------------------------|---------------------------------------------------------------------------------------------------------------------------------------------------------------------------------|---------|--------------------------------------|------------------------------------------------------------------------------------------------------------------------------------|

\*IQ is Obtained with the application of the Wechsler intelligence scales.

## References

- Çak, H. T., Çengel, S. E., Gökler, B., Öktem, F., & Taşkıran, C. (2017). The Behavior Rating Inventory of Executive Function and Continuous Performance Test in Preschoolers with Attention Deficit Hyperactivity Disorder. *Psychiatry Investigation*, 14(3), 260-270. doi:https://doi.org/10.4306/pi.2017.14.3.260
- Ezpeleta, L., & Granero, R. (2015). Executive functions in preschoolers with ADHD, ODD, and comorbid ADHD-ODD: Evidence from ecological and performance-based measures. *Journal of Neuropsychology*, 9(2):258-270. doi:https://doi.org/10.1111/jnp.12049
- Lacerda, B., Martínez, S., Franz, A., Moreira-Maia, C., Silveira, R., Procianny, R., . . . Wagner, F. (2020). Does ADHD worsen inhibitory control in preschool children born very premature and/or with very low birth weight? *Trends in Psychiatry and Psychotherapy*, 42(4):340-347. doi:https://doi.org/10.1590/2237-6089-2019-0075
- Perrin, H., Heller, N., & Loe, I. (2019). School Readiness in Preschoolers With Symptoms of Attention-Deficit/Hyperactivity Disorder. *American Academy of Pediatrics*, 144(2):e20190038. doi:https://doi.org/10.1542/peds.2019-0038
- Schneider, H., Ryan, M., & Mahone, E. (2020). Parent versus teacher ratings on the BRIEF-preschool version in children with and without ADHD. *Child Neuropsychology*, 26(1):113-128. doi:https://doi.org/10.1080/09297049.2019.1617262
- Skogan, A. H., Zeiner, P., Egeland, J., Urnes, A.-G., Reichborn-Kjennerud, T., & Aase, H. (2015). Parent ratings of executive function in young preschool children with symptoms of attention-deficit/-hyperactivity disorder. *Behavioral and Brain Functions*, 11, Article 16. doi:https://psycnet.apa.org/doi/10.1186/s12993-015-0060-1
- Zhang, H., Shuai, L., Zhang, J., Wang, Y., Lu, T., Tan, X., . . . Shen, L. (2018). Neuropsychological Profile Related with Executive Function of Chinese Preschoolers with Attention-Deficit/Hyperactivity Disorder: Neuropsychological Measures and Behavior Rating Scale of Executive Function-Preschool Version. *Chinese Medical Journal*, 131(6), 648-656. doi:https://doi.org/10.4103/0366-6999.226893.
